# Supplementary material for: A probiotic multi-strain mixture combined with hydroxyectoine improves intestinal barrier function by alleviating inflammation in lipopolysaccharide stimulated differentiated Caco-2 cells
Source: Royal Society of Chemistry journal article supplement (doi:10.1039/d4fo03130j), 2024-01-01

## WESTERN BLOT ORIGINAL SHEETS

**Probiotic multi strain mixture combined with hydroxyectoine improve  
intestinal barrier function by alleviating inflammation in  
lipopolysaccharides stimulated differentiated Caco-2 cells**

# GAPDH

Figure 1 raw data in the manuscript

Figure 5 raw data in the manuscript

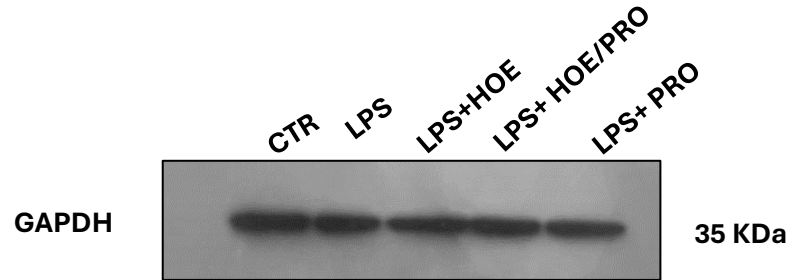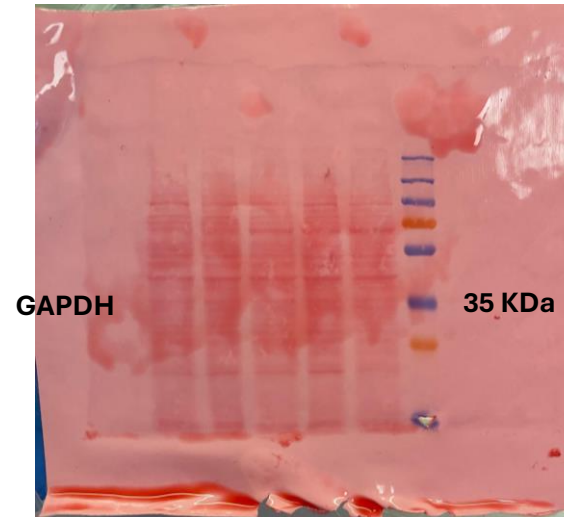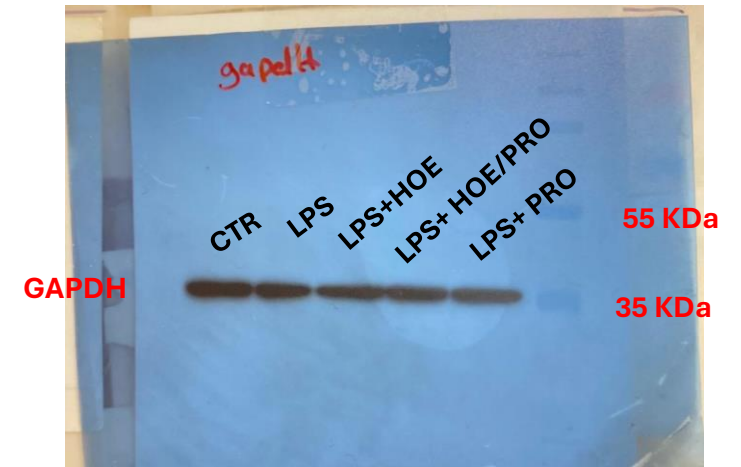

# TLR-4

Figure 5. Data in the manuscript

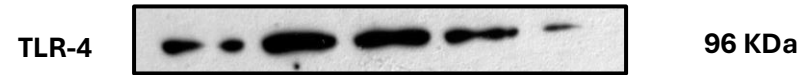

Figure 5. Original sheets

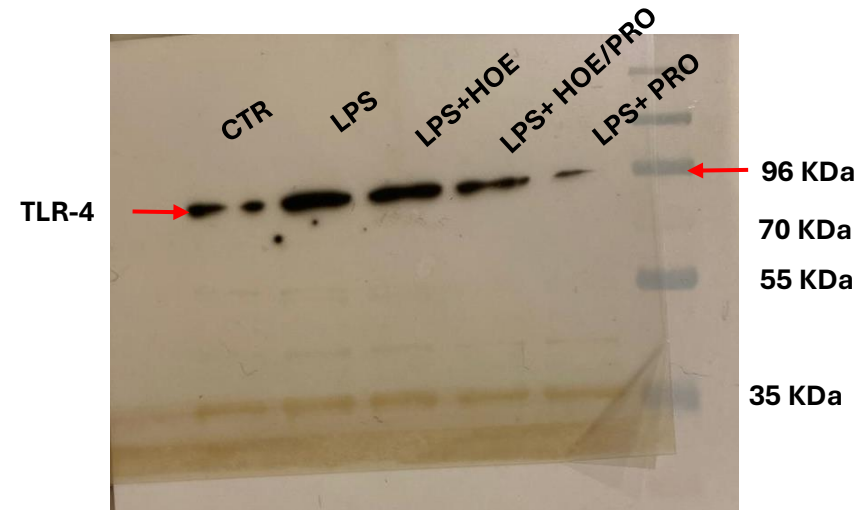

# Nf-k $\beta$

Figure 5. Data in the manuscript

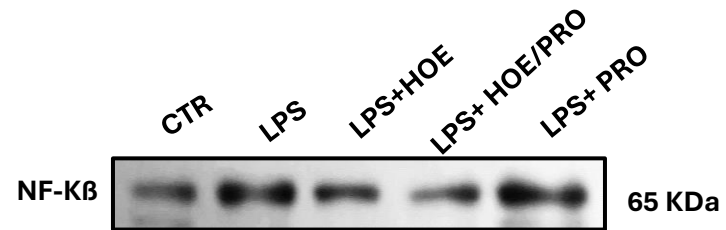

Figure 5. Original sheets

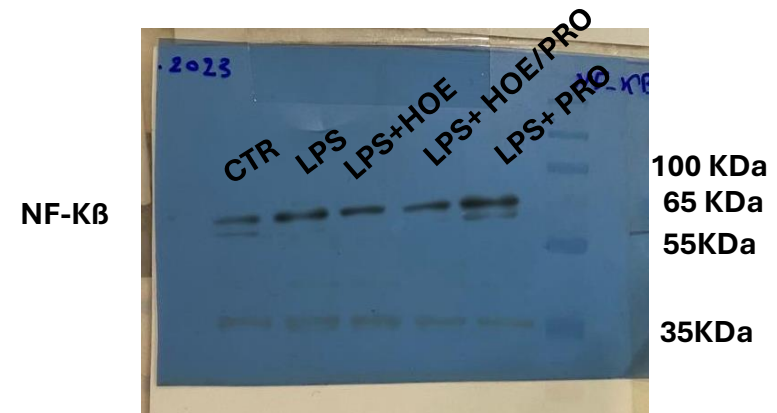

Supplement: d4fo03130j2.pdf [file d4fo03130j2.pdf]
